# Training-of-trainers program for community health workers involved in an innovative and community-based intervention among goldminers in the Guiana Shield: a quality and effectiveness evaluation.

1 Carboni Carlotta<sup>1\*</sup>, Jimeno Maroto Irene<sup>1</sup>, Galindo Muriel<sup>1</sup>, Plessis Lorraine<sup>1</sup>, Lambert Yann<sup>1</sup>,  
2 Bardon Teddy<sup>1</sup>, Vreden Stephen<sup>2</sup>, Suárez-Mutis Martha<sup>3</sup>, Miller Bordalo Jane<sup>4</sup>, Douine  
3 Maylis<sup>1</sup>, Sanna Alice<sup>1</sup>

4 <sup>1</sup> Centre d'Investigation Clinique Antilles-Guyane (Inserm 1424), Département Recherche,  
5 Innovation et Santé Publique, Centre Hospitalier de Cayenne, Cayenne, French Guiana, France

6 <sup>2</sup> Foundation for the Advancement of Scientific Research in Suriname (SWOS), Paramaribo,  
7 Suriname

8 <sup>3</sup> Laboratório de Doenças Parasitárias, Instituto Oswaldo Cruz, Fiocruz, Rio de Janeiro, Brazil

9 <sup>4</sup> DPAC Fronteira, Oiapoque, Brazil

10 \* **Correspondence:**

11 Carboni Carlotta

12 [carbonicarlotta@gmail.com](mailto:carbonicarlotta@gmail.com)

13

14 **Keywords: Training-of-trainers, Training Programs, Community Health Workers, Capacity-**  
15 **building, Malaria, Goldminers, Amazon.**

16 **Abstract**

17 **Introduction:** An innovative and community-based intervention is implemented in the Guiana Shield  
18 to eliminate malaria among people involved in artisanal and small-scale gold mining. The intervention  
19 is possible in the field thanks to community health workers (CHWs) who are previously trained to  
20 master all intervention's procedures, including training gold miners to treat themselves for malaria.  
21 This article describes thus a training-of-trainers (ToT) program for CHWs, as well as the method and  
22 results of its evaluation in terms of quality and effectiveness. **Methods:** A mixed-method case study  
23 was implemented in two steps and based on knowledge survey, satisfaction test, observations and semi-  
24 structured interviews. Quantitative and qualitative data were triangulated. **Results:** The project team's  
25 previous experience and the Guiana Shield countries' commitment to the WHO E-2025 initiative were  
26 identified as levers for the quality of the ToT training, while the complexity of the project context was  
27 a challenge. Group dynamics and adaptations were found to be central elements of a high-quality  
28 training program. CHWs' satisfaction was elevated especially regarding training format and learning  
29 results. Improvements on knowledge level demonstrated good effectiveness of the training.  
30 Nevertheless, some difficulties persisted regarding certain tasks to be carried out by CHWs during the  
31 intervention procedure. Further on-the-job training permitted to address them, improving CHWs'  
32 practices in the field. **Discussion:** High-quality, effective, and appropriate training programs are  
33 required for effective and sustainable intervention involving CHWs profiles. Training design is a  
34 crucial point to attend quality and effectiveness. ToT model has been shown to allow a high level of  
35 satisfaction, good learning results and satisfactory implementation in the field. Initial and continuing

36 training is an indispensable continuum to sustain good practices in the field and CHWs' motivation.  
37 Training evaluation permits to standardize methods and facilitate transferability of successful efforts.

38

## 39 **1 Introduction**

40 Although since 2000 the malaria burden considerably decreased in the Americas, it is still endemic in  
41 the Guiana Shield (1–3). In this area, the major malaria reservoir is represented by a mobile, and hard-  
42 to-reach population challenging the fight against malaria (4,5). This population is mainly represented  
43 by Brazilians (95-98%) involved in artisanal and small-scale gold mining (ASGM) in the Amazonian  
44 rainforest, where they live in a situation of vulnerability with reduced access to the health care system  
45 (6,7).

46 Despite the complexity of reaching populations suffering from social inequality, strategies have been  
47 developed to provide health care access (8). Indeed, at a global scale community-based interventions  
48 play a fundamental role in improving population health, and increasing access to health care and  
49 services (9,10). Worldwide, a range of effective interventions involving community health workers  
50 (CHWs) exists, especially with the aim of fighting malaria (11,12). In malaria elimination programs,  
51 CHWs are often involved in case management, malaria surveillance, diagnosis, treatment, prevention  
52 and health promotion activities (13).

53 A complex, innovative and community-based intervention has been implemented in 2018-2020 as a  
54 result of a scientific partnership established between Brazil, French Guiana and Suriname focusing on  
55 populations involved in ASGM in the Guiana Shield in situations of extreme isolation from health  
56 services (14). The aim was the evaluation of a strategy that consisted in providing access to diagnosis  
57 and treatment through the distribution of kits (called “malakits”), associated with a training to use it  
58 correctly (15). The malakit was composed of self-testing kits with rapid diagnostic tests (RDTs) and  
59 self-treatment kits in case of malaria This strategy was evaluated as effective and acceptable by the  
60 community, and has been scaled up in Suriname (16–18).

61 Started in 2023, another intervention's evaluation study – Curema – expands the foundations of the  
62 Malakit project to also include the radical cure of *Plasmodium vivax* (19,20) . Curema intervention  
63 consists of two modules offered at inclusion sites located in Brazil and Suriname, in resting and  
64 logistical places across the border in French Guiana, regularly frequented by people involved in ASGM  
65 in French Guiana: the “malakit” module and the “radical cure” module. The latter aims to prevent  
66 relapses and thus reduce the number of human hosts capable of transmitting the parasite; asymptomatic  
67 individuals at risk of carrying *P. vivax* hypnozoites are offered presumptive treatment with chloroquine  
68 and aminoquinolines.

69 The intervention is made possible by CHWs, specifically recruited for the Curema project, and working  
70 in pairs on the field at the inclusion sites. As part of the Curema project, CHWs are responsible for  
71 enrolling participants and providing health education to participants followed by individual training  
72 during the inclusion process (**Figure 1**). Furthermore, they carry out collective outreach activities on  
73 malaria in the community.

74 Before the launch of the project, the CHWs participated in a training program which enabled them to  
75 take part in a bidirectional working space, to master health research procedures, to present information  
76 effectively, to lead activities that reinforce participants' learning, and to collaborate on the design of

77 working tools. Moreover, they were supported during the gradual launch of the project in the field and  
78 regularly supervised during the whole project implementation.

79 Despite the large integration of CHWs in public health interventions, little is known about best  
80 practices for training them. To ensure effective CHWs activities, it seems vital to provide a good  
81 training and a continuous professional development through supervisions. Nevertheless, literature is  
82 often lacking evidence on the implementation and evaluation of training programs. A number of  
83 theoretical frameworks have been developed for evaluating this process, but the introduction of  
84 standardized evaluation methods in the context of training evaluations is increasingly necessary (21–  
85 24).

86 Therefore, it seems crucial to share findings and experiences in this domain with the scientific  
87 community, in order to facilitate the transferability of successful efforts.

88 This present article aims to illustrate the results of an evaluation of the quality and effectiveness of the  
89 training program offered to CHWs involved in the Curema project.

## 90 **2 Materials and methods**

### 91 **2.1 Description of the Curema training program**

#### 92 **2.1.1 CHWs' recruitment**

93 The recruitment process was conducted separately by local partners for Brazilian and Surinamese  
94 inclusion sites with the support of the project's promotor, the Hospital of Cayenne, French Guiana.  
95 Their profile is similar to CHWs involved in malaria intervention in other countries (25,26). CHWs'  
96 recruitment criteria were: being over 18 years of age, belonging to the community involved in ASGM  
97 or knowing it closely, speaking fluent Portuguese, being able to use information technology tools  
98 (tablets, smartphones, etc.), living in or being prepared to move to one of the project locations for  
99 inclusion sites. Moreover, a technical diploma as nurse-assistant was an asset for CHWs assigned to  
100 Brazil.

101 The CHWs working at the Brazilian inclusion sites were employed by the NGO DPAC-Fronteira  
102 (*Desenvolvimento, Prevencao, Acompanhamento e Cooperacao de Fronteiras*; Development,  
103 Prevention, Support and Cooperation on Borders) and were only involved in activities linked to the  
104 Curema project. DPAC-Fronteira selected CHWs before they underwent the training program. At the  
105 Surinamese inclusion sites, the CHWs were employed by the Surinamese research foundation SWOS  
106 for the Curema project (half-time) and by the Surinamese National Malaria Elimination Programme  
107 (NMEP) for the second half-time as “malaria service deliverer” (MSD). This MSD role included in  
108 malaria case management (diagnosis, treatment, notification, and investigation) as well as in  
109 distributing mosquito nets, in remote areas related to ASGM (27). CHWs for Suriname inclusions sites  
110 underwent a two-steps recruitment process, consequently a larger number of potential CHWs was  
111 invited to attend the training program. Most CHWs invited to attend the Curema training program,  
112 already functioned as MSD in the mining fields. It was made clear to all trainees, that participating in  
113 the training was no guarantee for being selected to work in the Curema project. Final CHWs were  
114 selected after the end of the initial training, just before the launch of the project in the field.

115 Prior to the Curema training program, CHWs undertook basic training sessions separately as a pre-  
116 work. In Brazil, a basic one-day training on malaria was provided by Fiocruz and a training on NGO

117 work and community mediation was provided by DPAC. In Suriname, CHWs received initial and  
118 refresher training on malaria prevention, diagnosis, and treatment techniques by NMEP.

## 119 **2.1.2 Design and development of the training program**

120 With the aim of making CHWs able to master all the procedures and tasks they need to carry out, the  
121 Curema training program was designed using a training-of-trainers (ToT) model with two components:  
122 an initial training and an on-the-job training (**Figure 2**).

123 Adult learning principles were applied to design the training program focusing on practice-based  
124 activities to be appropriate for CHWs' needs and to give them the opportunity to practice (28). To be  
125 more effective, and to reach all of the audience, varied activities and methods were implemented  
126 mobilizing cognitive, affective, psychomotor learning principles, and the visual, auditory and  
127 kinesthetic (VAK) learning model (29–31). Moreover, the training program was tailored and centered  
128 on CHWs. Therefore, the training program was conducted in Portuguese using learning tools targeting  
129 on an audience with a low level of scholarship.

130 All partners and organizations involved in the Curema project participated in the training program,  
131 increasing contributions from all staff and from professionals with different experiences and expertise.  
132 Trainers used a horizontal approach to make CHWs feel respected and to make the learning  
133 environment safe and supportive. To be more responsive to the needs of the CHWs and the community  
134 in the field, a bidirectional approach was used, and CHWs were asked to collaborate in the design of  
135 operating tools.

136 The initial training component took place in Paramaribo, Suriname, jointly by the entire team of CHWs  
137 both from Suriname and Brazil. Considering the type and number of topics to be addressed, the initial  
138 training was developed for three-weeks to allow enough time to ensure an effective knowledge transfer,  
139 an exhaustive practice of skills and new procedures, an appropriate adaptation of tools, and a good  
140 team and capacity building.

141 The on-the-job training component took place at each inclusion site and lasted two to three days. Its  
142 aim was to support CHWs while the project was gradually rolled out in the field and the first inclusions  
143 carried out.

144 The components included on the ToT program, as Centers for Disease Control and Prevention  
145 recommend, are shown in **Table 1** (32).

## 146 **2.2 Evaluation of the quality and effectiveness of the training program**

### 147 **2.2.1 Framework**

148 Evaluation was carried out for the quality and effectiveness of training.

149 Quality was defined by the International Standard Vocabulary as “all the characteristics of an entity  
150 that influence its ability to satisfy expressed and implicit needs” (33). In this context, authors referred  
151 to “needs” as the outcomes to be achieved by CHWs through the training program.

152 Effectiveness corresponded to the extent to which the training outcomes are achieved. According to  
153 Kirkpatrick's theoretical framework, effectiveness is assessed at 4 levels: reaction, learning, behavior,  
154 and system (34).

155 The elements to be evaluated were defined as follow (24):

- 156 • Quality assessment
  - 157 ○ Context: external factors which can influence the training program, both as obstacles
  - 158 and levers and which cannot be controlled by the training deliverers.
  - 159 ○ Input: internal conditions under which the training program takes place (eg. methods
  - 160 used by trainers, CHWs' prior knowledge, group dynamism, etc.).
  - 161 ○ Process: the training delivery process, including the adaptation, dose delivered, CHWs
  - 162 reached.
- 163 • Effectiveness assessment
  - 164 ○ Reaction: level of CHWs' satisfaction in terms of dose and content.
  - 165 ○ Learning: changes in level of knowledge, know-how and interpersonal skills.
  - 166 ○ Behavior: level of concordance of CHWs' practice with the reference (Curema
  - 167 protocol)
  - 168 ○ System: impact of CHWs' practice on community health education

### 169 **2.2.2 Methods**

170 The design of the training evaluation consisted of a mixed-method case study, executed in two steps  
171 as shown in **Figure 2**. Firstly, during the initial training in Paramaribo developed in a classroom  
172 environment, and secondly during the on-the-job training during the launch of the intervention on  
173 inclusion sites. First step is nurture by quantitative and qualitative methods, while second step  
174 correspond to qualitative method. The quantitative component provided computable data on  
175 satisfaction, knowledge improvement and practice, while the qualitative component enabled giving  
176 context and an in-depth explanation of the quantitative results.

177 Data were collected through knowledge surveys, a satisfaction test, observations, and semi-structured  
178 interviews, and analyzed as follows (**Table 2**):

179 The analysis was conducted using a theoretical framework conceptualized for the evaluation of training  
180 programs for the control of infectious diseases in cross-border contexts, by the Centre for Infectious  
181 Disease Control, National Institute for Public Health of Health of The Netherlands and The EU Healthy  
182 Gateways Joint Action (24).

### 183 **2.2.3 Ethics**

184 Curema protocol was approved by the ethics committees of the countries involved in the project  
185 (Brazil: CONEP:5,507,241 and Suriname: CMWO05/22). The evaluation of quality and effectiveness  
186 of CHWs' training program is part of the secondary objectives of the Curema protocol.

187 According to the article R1121-1 of the French Public Health Code, the regulatory classification of this  
188 evaluation is a “research not involving the human being” (outside the scope of the *Loi Jardé* or *RNIPH*)  
189 because it “aims to evaluate the methods of practice of healthcare health professionals or teaching  
190 practices in the field of health”(35). A collective oral information was reached out and participants'  
191 non-opposition was collected. For semi-structured interviews, consent was requested.

192 The evaluation was conducted in accordance with the principles of the Declaration of Helsinki. Data  
193 collected were recorded in accordance with French law and the European Union General Data  
194 Protection Regulation. Data collected, field notes and transcribed recordings were anonymized and  
195 stored on a secure server.



## 196 **3 Results**

197 The initial training took place between February the 13<sup>th</sup> 2023 and March the 03<sup>rd</sup> 2023. On-the-job  
198 training started with the launch of the intervention at the first inclusion site on March the 13<sup>th</sup> 2023 and  
199 lasted two to three days per site. The evaluation was carried out between February the 13<sup>th</sup> 2023 and  
200 April the 03<sup>rd</sup> 2023.

### 201 **3.1 CHWs profile**

202 A total of 20 CHWs were invited for the training program, 14 from Suriname employer-organizations  
203 and 6 from Brazil employer-organization. The characteristics of the trainees are summarized in **Table**  
204 **3**. The majority were women over 40, with Portuguese as their mother tongue. Five CHWs had Spanish  
205 as their mother tongue, but could proficiently speak and understand Portuguese. Less than a quarter  
206 had previously worked in research. CHWs profiles were different in Brazil and in Suriname because  
207 of different recruitment criteria. Of the 20 CHWs, 4 took part in individual semi-structured interviews  
208 during Evaluation Step 2.

### 209 **3.2 Results of the quality evaluation**

#### 210 **3.2.1 Contextual levers and difficulties**

211 Two elements were identified as levers for the training. The first is the political, economic and  
212 intellectual environment in which the Curema project – and consequently the training program –  
213 navigates. In fact, Suriname and French Guiana have committed to eliminate malaria from their  
214 territories by 2025 (World Health Organization's E-2025 initiative) and Brazil by 2035 (1,36,37). There  
215 is no doubt that this commitment ensured good conditions for the start of Curema intervention and its  
216 training program. Second, previous lessons learned during Malakit project by our team in training the  
217 same community in a similar context and partners experiences were precious to guide the design and  
218 development of the ToT program, particularly regarding the methodology, the time, the appropriate  
219 tools for the audience (38).

220 On the other hand, the complexity of Curema project also influenced the training because of a large  
221 number of interacting components that are sometimes difficult to align in order to make possible the  
222 training program development (39). In fact, Curema is an international project which means several  
223 organizational levels, country-specific features for implementation on the field, communication in  
224 different foreign languages depending on the actors, logistical issues linked to differences in  
225 bureaucracy and regulatory requirements between countries (40). Moreover, it was important to  
226 consider that the number and level of articulations of the activities required by CHWs complexified  
227 the training program design. Finally, differences on recruitment and employment frameworks made  
228 CHWs group composition heterogeneous: previous baselines knowledge were dissimilar due to  
229 previous experiences and to a pre-work organized separately for Brazil and Suriname.

#### 230 **3.2.2 The importance of group dynamics**

231 Among the CHWs who attended the training program, 4 (20.0%) had already worked in the research  
232 field and 10 (50%) had already collaborated with one of the three employer-organizations involved in  
233 the Curema project. We observed that, for these CHWs, prior knowledge of certain procedures  
234 increased mastery of the subject and reduced the time needed to learn. In addition, thanks to a  
235 participatory approach to training and the inclusion of practical sessions of pair and group work in the  
236 schedule, peer education dynamics took place. The attention in the choice of the classroom and the  
237 setting is also decisive in the generation of these dynamics. Thus, these CHWs became a resource for

238 supporting training. However, certain disadvantages were also identified such as the transfer of some  
239 erroneous automatisms already adopted in their practice. Feedback activities allowed to readjust  
240 practices.

241 The observed interpersonal relationships among CHWs had a strong influence on group dynamics for  
242 learning, active participation in training and engagement in the project. Because of the different  
243 recruitment framework, at the beginning of the training program CHWs appeared to form two distinct  
244 groups. Based on team building and adult-learning principles, more collaborative activities were  
245 implemented in order to facilitate exchanges and integration. Some spontaneous team-building  
246 initiatives were also pointed out.

247 *“Afterwards, the group work was done, which [...] allowed people to feel more in tune with each other*  
248 *and communication improved [...] which was fun and at the same time a joint learning process, it was*  
249 *very good.” (Interview verbatim, CHW from Suriname)*

### 250 **3.2.3 A flexible and evolutive process**

251 The training was delivered in 105 hours over a period of three consecutive weeks (**Table 1**). The  
252 training program was designed to be part of a continuous professional development approach centered  
253 on CHWs. Thus, it was flexible and evolutive. Numerous adaptations were made to ensure constant  
254 improvement of CHW knowledge and practice and to perfect training (schedule, activities, tools) and  
255 project elements. Indeed, many of those elements had already been co-designed through community  
256 involvement. The bidirectional working space during the training sessions enabled to adapt vocabulary  
257 and content of the inclusion questionnaire, to add supplementary material in the facilitation manual, to  
258 make a video for the informed consent procedure. As they reported during informal conversations and  
259 semi-structured interviews, CHWs greatly appreciated the opportunity to be part of this evolution  
260 process.

## 261 **3.3 Results of the effectiveness evaluation**

### 262 **3.3.1 Reaction: participant’s satisfaction**

263 Overall, CHWs affirmed to be very satisfied with the training. The methodology used for the training  
264 was particularly appreciated by CHWs with reference to activities using kinesthetic learning model,  
265 practice-based activities, group-work and bidirectional approach. All items (**Table 2**) explored on the  
266 scale of 1-5 ranging from "not at all satisfied" to "completely satisfied", were ranked over 4.  
267 Satisfaction is shown to be directly linked to learning:

268 *“It was fun, creative, and useful for memorizing, because you remember [what you learn using these*  
269 *techniques], isn't it? We don't forget. The games were very good” (Interview verbatim, CHW from*  
270 *Suriname).*

271 Indeed, the 61.1% of the 18 CHWs answering the satisfaction test declared had reached "optimum  
272 mastery", the 27.8% reported "sufficient mastery but needed support during the launch in the field";  
273 and only one person felt "insufficient mastery" asking for "more time for training".

274 CHWs were observed to be satisfied also during on-the-job training. In fact, some of them stated  
275 trainees indicated that the sessions provided the knowledge and practice needed to start the job in the  
276 field.

### 277 **3.3.2 Learning: evaluation of knowledge improvement**

278 The evaluation found a knowledge improvement with a significant increase in the average scores of  
279 the test between pre and post survey with a  $p < 0.05$  both for test scores at  $t_0 - t_1$  and  $t_0 - t_2$  (**Figure 3**). On  
280 the contrary, differences in scores between tests at  $t_1$  vs  $t_2$  were not significant ( $p = 0.26$ ). The same  
281 trend was shown for analyzing individual scores' increase for CHWs which underwent the knowledge  
282 survey at  $t_0$ ,  $t_1$ , and  $t_2$ . The bivariate analysis for age, sex, recruitment country, mother tongue and  
283 previous collaboration did not show any differences in these categories, apart from a better basic  
284 knowledge in the  $t_2$  test among those with previous experience in research field ( $p < 0.05$ ).

285 Systematic inclusion process monitoring through the checklist pointed out that two-thirds of observed  
286 inclusion simulations ( $n = 16$ ) contained inaccuracies in the step-by-step process. Nevertheless,  
287 inaccuracies often concerned the same steps. The highest rate of inaccuracy was found for the  
288 explanation of the patient information note for informed consent procedure that was inaccurate in  
289 29.2% of the observed inclusion simulations, followed by the process of installing the Curema  
290 smartphone application, which had an inaccuracy rate of 16.7%. These results are in line with the  
291 results of the qualitative analyses based on informal conversations and interviews with CHWs who  
292 also reported reasons why those two steps were difficult in their opinions. First, the information note,  
293 using scientific terms and constructions, was dense of complex concepts and difficult to be understand  
294 for people with poor level of scholarship.

295 *“What really frightened us, I can say for myself and for several other people, was the informative note*  
296 *[...] What really complicates things for me is the informative note.” (Interview verbatim, CHW from*  
297 *Suriname)*

298 Second, the Curema smartphone application was not enough explored during the training program.  
299 Indeed, at that time, some technical developments of the application were in progress. Thus, the final  
300 version and procedure to use it were not integrally exposed.

### 301 **3.3.3 Behavior: from the training to the field**

302 During the observed launch at the inclusion sites, the level of concordance of CHWs' practices with  
303 the Curema standard procedures was adequate even if, during on-the-job training, further support by  
304 trainers was needed to guide CHWs towards autonomy. Moreover, CHWs expressed the need for more  
305 time and fieldwork to master the step-by-step process and re-elaborate concepts for an effective  
306 knowledge transfer to the community.

307 Constructive professional relationships, good team working, and a sense of belonging to a common  
308 cause were also pointed out by CHWs as factors able to influence behavior in the field, leading to  
309 engagement and proactive participation in the intervention.

310 *“If you don't feel good in the team, this can have an influence on your motivation, for example, in the*  
311 *way the work is run.” (Interview verbatim, CHW from Suriname)*

## 312 **4 Discussion**

313 High-quality, effective, and appropriate training are required for effective and sustainable intervention  
314 involving CHWs profiles. This involves a great deal of effort in development, implementation, and  
315 evaluation. Moreover, this study highlights the importance of quality to achieve effectiveness of a  
316 training program. ToT model has been shown to allow a high level of satisfaction, good learning results  
317 and satisfactory implementation in the field.



#### 318 **4.1 Limits of our study**

319 The evaluation was carried out by researchers previously involved in the design, development, and  
320 implementation of the training. Despite this could lead to attribution bias, several data sources – both  
321 quantitative and qualitative – were used for the evaluation, enabling data triangulation and increasing  
322 internal validity.

323 The Kirkpatrick’s theoretical framework used recommends to assess effectiveness at 4 levels: reaction,  
324 learning, behavior, and system. The higher the impact in terms of effectiveness, the better the achieved  
325 the final training outcome (24). Nevertheless, the assessment at the system level is more challenging  
326 and we were unable to evaluate it. A further evaluation of learning transfer to the community at the  
327 end of the intervention could be realized by the post-intervention cross-sectional survey and would be  
328 very useful.

#### 329 **4.2 Training design: a crucial step**

330 Developing a high-quality training program demands careful considerations of the learning methods  
331 and modules to be designed. We designed the training program on a ToT model based on adult-learning  
332 principles. Consequently, the training program contained ample interactive sessions including group  
333 discussions, role plays, practical activities, and simulations. This methodology is considered more  
334 effective in comparison to traditional teaching approaches, especially among CHWs with poor level of  
335 scholarship (9,41). Despite complexities, we can affirm that the quality of the training was good and met  
336 the needs for the implementation of the Curema intervention in the field. The significant increase in  
337 pre-post scores obtained at the knowledge survey suggests the achievement of theoretical concepts.  
338 Moreover, the ample panel of activities helped increase the satisfaction level, in accordance with the  
339 literature (24).

340 A crucial point to be discussed is adaptations. During the training program, several adaptations were  
341 necessary to be adopted both for training program and for the intervention on the field. We could even  
342 say that one of the aims of the training was to enable these adaptations to be made, thanks to the  
343 bidirectional space set up with the CHWs. Despite the balance between adaptation and fidelity in  
344 implementation science is still a topic of debate (42–44), several examples in literature described  
345 helpful adaptations: Miller et al. adapted terminology of their intervention to reduce the possibility of  
346 misinterpretation of their study population, while Holtrop et al. shown training program or recruitment  
347 adaptations due to outside forces or made to improve feasibility or engagement (45,46). A review by  
348 Stirman et al. identified most common reasons intervention adaptation were to address language,  
349 cultural differences, literacy, or situational constraints (47). In our experience, we can argue that  
350 adaptive aptitude, embedded in a community-based approach, may have enabled our intervention to be  
351 more appropriate, effective, and sustainable by fostering the bidirectional transfer of knowledge, the  
352 empowerment of CHWs as a central actor of the intervention, and their engagement in the Curema  
353 project.

354 To be appropriate, trainings of the CHWs should take place in their work environment to practice in a  
355 real-life situation (48,49). Our quantitative and qualitative results suggested that, although many  
356 simulations were carried out during the initial training, real practice in the field during on-the-job  
357 training permitted CHWs to improve mastery of procedures and to appropriately perform participants’  
358 inclusions and education activities regarding malaria. Similar results have been shown in previous  
359 experiences among the same community and intervention patterns by Galindo et al. who concluded  
360 that practical training in the field was the most appropriate learning method for CHWs (38). Besides,  
361 a scoping review describing training, supervision and quality of care in community-based programs in

362 different contexts from the studied one, also concluded that training in the field and on-site have been  
363 shown to improve CHWs' practices (50).

364 Another important element to address is team-building, which has been found out as a crucial element  
365 for learning process and daily work on the field. During the training, the team-building activities helped  
366 to motivate CHWS and encouraged peer learning. Moreover, the sense of unity jointly with the  
367 engagement towards the goal of eliminating malaria increased CHW's motivation in the daily working  
368 context, particularly in regions where malaria is in the process of being eliminated. Similar results  
369 showing how relationships with other cadres and actors could play a major role on sustain motivation  
370 are reported in literature (51,52).

### 371 **4.3 Evaluation**

372 Nowadays, limited number of studies exists regarding quality and effectiveness evaluation of training  
373 programs, especially those regarding infectious diseases in cross-border areas and those addressed to  
374 CHWs. Indeed, a recent review of the literature analyzed 62 articles on the evaluation of ToT, and  
375 found only 5 in the field of infectious diseases and in cross-border contexts, with heterogeneous and  
376 non-standardized methodologies (24). Reviewing articles on CHWs-based programs for cardiovascular  
377 disease management in low-income and middle-income countries with the aim of evaluate training  
378 program effectiveness, Abdel-All and al. found only 8 articles reporting training details on evaluation,  
379 among 90 eligible for their systematic review (53).

380 Scientists call for studies examining the effectiveness and characteristics of training programs for  
381 CHWs to provide reliable evidence, to avoid replication of programming difficult, to ensure high-  
382 quality of training programs, to make possible standardization on the evaluation (53–57). This study  
383 shows as developing methodology for training evaluation is possible, feasible and necessary to ensure  
384 advancements on this field. Evaluation of training programs must be integrated in all CHWs-based  
385 health intervention.

### 386 **4.4 Initial and continuing training: an indispensable continuum**

387 ToT is a good predictor of the long-term sustainability of public health initiatives (23). This ToT  
388 program was the starting point of a continuous professional development scheme; indeed we  
389 considered continuing re-training as important as initial training. In fact, despite a widespread lack of  
390 ongoing training or other forms of continuing professional development, several studies have found  
391 the positive association between training and maintaining good standards of practices. (58–61). This is  
392 shown to be linked: (i) to refresh of acquired skills and knowledge and (ii) to motivation. For instance,  
393 Curtale et al. suggest that even few days additional training/supervision, if regularly provided, results  
394 in improved quality of service (62). Furthermore, access to training and supervision seems to be  
395 associated with non-monetary incentive sustaining CHWs motivation and engagement (13,61).  
396 Moreover, a continuing training centered on CHWs seems to be an asset to the strategy of continuous  
397 professional development. Puchalski Ritchie et al. in their training course, established training contents  
398 on needs they identified through a prior qualitative survey performed by CHWs (63). These  
399 recommendations sustain the design we adopted.

400 Ongoing training, including various moments of evaluation and reflection, enable interventions to be  
401 adjusted in time to ensure proper implementation. Constant efforts throughout the project are essential  
402 to maintain quality while adapting to the inevitable changes in the context in which the intervention  
403 evolves.

404

405 **5 Figure legends**

406 **Figure 1:** CHWs tasks over Curema enrolling process and knowledge/skills associated with.

407 **Figure 2:** Timeline and flowchart of the training design and training evaluation over Curema  
408 intervention phases.

409 **Figure 3:** Evolution over time in the knowledge survey score for basic knowledge (at  $t_0$ ,  $t_1$ , and  $t_2$ )  
410 among all CHWs (A), for advanced knowledge (at  $t_1$ , and  $t_2$ ) among all CHWs (B), for basic knowledge  
411 (at  $t_0$ ,  $t_1$ , and  $t_2$ ) per CHWs (C), for advanced knowledge (at  $t_1$ , and  $t_2$ ) per CHWs (D).

413 **Table 1:** The ToT components included on the Curema training program.

| ToT component              | Pre-assessment                                                                                                                | Pre-work                                                                                                                                                                                                                                                                                                                                                                                                                                 | Training agenda                                                                                       | Facilitation manual                                                                                                                                                                                                                                                        | Modelling of skills and tasks                                                                                                                                                                                                                                                                   |
|----------------------------|-------------------------------------------------------------------------------------------------------------------------------|------------------------------------------------------------------------------------------------------------------------------------------------------------------------------------------------------------------------------------------------------------------------------------------------------------------------------------------------------------------------------------------------------------------------------------------|-------------------------------------------------------------------------------------------------------|----------------------------------------------------------------------------------------------------------------------------------------------------------------------------------------------------------------------------------------------------------------------------|-------------------------------------------------------------------------------------------------------------------------------------------------------------------------------------------------------------------------------------------------------------------------------------------------|
| <b>Aim</b>                 | Identifying pre-training knowledge and skills of the CHW, to determine training needs                                         | Providing CHWs with the knowledge and background needed before the training program                                                                                                                                                                                                                                                                                                                                                      | Providing some degree of control over what, when and how CHWs will learn during the training program. | Organizing tools and improving the capacity of CHWs to transfer knowledge                                                                                                                                                                                                  | Enabling CHWs to form a clear idea of how to carry out a task by showing them how to perform a skill while describing each step                                                                                                                                                                 |
| <b>Initial Training</b>    | Pre-training knowledge survey                                                                                                 | <p>Topics: basic knowledge about malaria (diagnosis and treatment), epidemiology in the Guiana Shield and malaria control strategies</p> <p>Pre-work training sessions took place separately for the CHWs working on the inclusion sites located in Brazil or Suriname, due to different recruitment frameworks. Those sessions were provided respectively by two different organizations, due to legitimacy of respective countries</p> | Provided on the first day of the training                                                             | <p>Audio-visual tools (i.e. a step-by-step tutorial about how to perform a Malakit RDT) were uploaded to tablets</p> <p>Visual sheets for explanation support were put together in a CHW binder</p> <p>Games and teach-back cards were also provided as teaching tools</p> | <p>Following training units:</p> <p>Audio-visual tutorial for Malakit RDT and for G6PD test;</p> <p>Information Education and Communication (IEC) strategies and tools use;</p> <p>Inclusion process simulation role-play;</p> <p>Informative note and informed consent procedure role-play</p> |
| <b>On-the-job training</b> | <p>Post-initial-training knowledge survey</p> <p>Feedback of the trainers regarding the initial training program outcomes</p> | Initial training                                                                                                                                                                                                                                                                                                                                                                                                                         | Not applicable                                                                                        | The same tools and CHW binder with the addition of some updated sheets                                                                                                                                                                                                     | Not applicable                                                                                                                                                                                                                                                                                  |

| <b>ToT component</b>       | <b>Adults learning principles</b>                                                                                                                                                                                         | <b>Skill practice</b>                                                                                                                                                                                                                                        | <b>Feedback</b>                                                                                                                                                                                                                                | <b>Action planning</b>                                                                                                        | <b>Planned follow-up support</b>                                                                                                                           |
|----------------------------|---------------------------------------------------------------------------------------------------------------------------------------------------------------------------------------------------------------------------|--------------------------------------------------------------------------------------------------------------------------------------------------------------------------------------------------------------------------------------------------------------|------------------------------------------------------------------------------------------------------------------------------------------------------------------------------------------------------------------------------------------------|-------------------------------------------------------------------------------------------------------------------------------|------------------------------------------------------------------------------------------------------------------------------------------------------------|
| <b>Aim</b>                 | Diversifying activities based on VAK Model and Bloom's Taxonomy, enhancing experience, designing a problem-centered training program to reach CHWs and make the training effective                                        | Providing the opportunity for the practice of selected training activities or contents.                                                                                                                                                                      | Collecting CHWs' feedback regarding the learning process to be adjusted.                                                                                                                                                                       | Taking CHWs through the process of creating or adjusting tools and practices for the intervention to succeed.                 | Strengthening the knowledge and skills of CHWs, so they can be applied effectively.                                                                        |
| <b>Initial Training</b>    | Implementation of games, practical simulations, video making, and a variety of activities with movements needed<br><br>Activities in small working groups composed of heterogeneous profiles for skills and personalities | Practice of:<br>data collection, tablet use, G6PD test execution, Malakit RDT execution monitoring, participants and community training, health education, public speaking, inclusion process simulations, installation of Curema application for smartphone | Daily debriefing at the beginning of the day regarding previous content, doubts, difficulties.<br><br>Use of a checklist to help on completing the whole inclusion process<br><br>Satisfaction assessment and discussion group on the last day | Information Note video - for the signature of the ICF (Informed Consent Form)<br><br>Feedback about Questionnaire             | Continuous professional development through on-going training for the intervention launch on the inclusion sites.                                          |
| <b>On-the-job training</b> | Directly linked to on-site work and problem-solving                                                                                                                                                                       | Inclusion process, community outreach activities                                                                                                                                                                                                             | Debriefing together at the end of inclusion process (either real process or simulations)                                                                                                                                                       | CHWs' initiatives encouraged (group of discussions, projection of promotional videos, marauding and outreach activities, etc) | Continuous professional development and targeted follow-up:<br><br>(i) regular supervision visits<br><br>(ii) remote support via a specific WhatsApp group |



416 **Table 2:** Methodology used to evaluate quality and effectiveness of the Curema training program.

| Evaluation method                        | Collection Tool                                                                                                                                                                                                                    | Inclusion criteria                                                                                                                                                                                                                                                                                                       | Temporal aspects                                                                                                                                       | Analysis                                                                                                                                                                                                                                                                                                  | Software                                                                                                                                  |
|------------------------------------------|------------------------------------------------------------------------------------------------------------------------------------------------------------------------------------------------------------------------------------|--------------------------------------------------------------------------------------------------------------------------------------------------------------------------------------------------------------------------------------------------------------------------------------------------------------------------|--------------------------------------------------------------------------------------------------------------------------------------------------------|-----------------------------------------------------------------------------------------------------------------------------------------------------------------------------------------------------------------------------------------------------------------------------------------------------------|-------------------------------------------------------------------------------------------------------------------------------------------|
| <b>Knowledge survey</b>                  | Basic and advanced multiple choice and true-false questions                                                                                                                                                                        | All CHWs attending the training program who agreed to undergo the knowledge survey (N=18 at t <sub>0</sub> ; N=16 at t <sub>1</sub> ; N=15 at t <sub>2</sub> )                                                                                                                                                           | Evaluation step 1:<br>Pre-training (t <sub>0</sub> ), immediate post-training (t <sub>1</sub> ) and 1-month follow-up (t <sub>2</sub> ) questionnaires | Mann–Whitney–Wilcoxon U test to compare average scores;<br>Wilcoxon signed ranks test to compare average scores only for CHWs answered the three tests;<br>Bivariate analyse of the following variables: age, gender, recruitment country, mother tongue, previous collaboration, retained after training | Microsoft® Excel® for Microsoft 365 MSO (Version 2304 Build 16.0.16327.20200)<br>Stata® (Version 14.2 Copyright 1985-2015 StataCorp LLC). |
| <b>Observation (direct and indirect)</b> | Observation guide to collect:<br>Informal conversations with participants and trainers;<br>Participant observation;<br>Systematic inclusion process monitoring through a check-list;<br>Documentary research;<br>Discussion groups | Evaluation step 1:<br>All CHWs attending the initial training who agreed to participate in the observation (N=20)<br><br>Evaluation step 2:<br>Convenience sampling depending on the inclusion site to be launched. CHWs assigned to the predetermined inclusion site who agreed to participate in the observation (N=4) | Evaluation step 1:<br>During the initial training<br><br>Evaluation step 2:<br>During on-the-job training                                              | Inductive content analysis;<br>Descriptive analysis for quantitative data                                                                                                                                                                                                                                 | ATLAS.ti® (Version 23.1.2.0, licence L-685-998).<br>Microsoft® Excel® for Microsoft 365 MSO (Version 2304 Build 16.0.16327.20200)         |
| <b>Satisfaction Test</b>                 | Single-choice and 5-point-Likert-scale test (anonymous test) to explore opinion on methodology, relevance, clarity, trainers support, practice, facilitation manual, group dynamics and logistic                                   | All CHWs attending the initial training who accepted to fill in the satisfaction test (N=18)                                                                                                                                                                                                                             | Evaluation step 1:<br>At the end of the initial training                                                                                               | Descriptive analysis                                                                                                                                                                                                                                                                                      | Mentimeter® (Version 3.2.7, 26-08-2021)                                                                                                   |
| <b>Semi-structured interviews</b>        | CHWs interviews: an interview guide was developed based on preliminary results of the observations                                                                                                                                 | Evaluation step 2:<br>Convenience sampling depending on the inclusion site to be launched. CHWs assigned to the predetermined inclusion site who agreed to be interviewed (N=4)                                                                                                                                          | Evaluation step 2:<br>During on-the-job training<br>(4h 38' 18")                                                                                       | Description analysis on the verbatim (Brazilian Portuguese) mainly deductive with inductive elements                                                                                                                                                                                                      | ATLAS.ti® (Version 23.1.2.0, licence L-685-998).                                                                                          |

418 **Table 3:** Characteristics of CHWs who attended initial training program in Paramaribo and who  
419 participated to semi-structured interviews

| CHWs characteristics                                     | Involved in the initial training in<br>Paramaribo<br>(N=20) |               | Involved in semi-structured<br>interviews<br>(N=4) |               |   |
|----------------------------------------------------------|-------------------------------------------------------------|---------------|----------------------------------------------------|---------------|---|
|                                                          | Percentage<br>(%)                                           | Number<br>(n) | Percentage<br>(%)                                  | Number<br>(n) |   |
| Sex                                                      |                                                             |               |                                                    |               |   |
|                                                          | Male                                                        | 20.0          | 4                                                  | 25.0          | 1 |
| Age (years)                                              |                                                             |               |                                                    |               |   |
|                                                          | 18-40                                                       | 20.0          | 4                                                  | 25.0          | 1 |
|                                                          | >40                                                         | 80.0          | 16                                                 | 75.0          | 3 |
| Country of the<br>employer-organization                  |                                                             |               |                                                    |               |   |
|                                                          | Brazil                                                      | 30.0          | 6                                                  | 0.0           | 0 |
|                                                          | Suriname                                                    | 70.0          | 14                                                 | 100.0         | 4 |
| Mother tongue                                            |                                                             |               |                                                    |               |   |
|                                                          | Portuguese                                                  | 75.0          | 15                                                 | 100.0         | 4 |
|                                                          | Spanish                                                     | 25.0          | 5                                                  | 0.0           | 0 |
| Previous collaboration with<br>the employer-organization |                                                             |               |                                                    |               |   |
|                                                          | Yes                                                         | 50.0          | 10                                                 | 100.0         | 4 |
| Previous work experience<br>in research                  |                                                             |               |                                                    |               |   |
|                                                          | Yes                                                         | 20.0          | 4                                                  | 0.0           | 0 |
| Belonging to ASCM- related<br>community                  |                                                             |               |                                                    |               |   |
|                                                          | Yes                                                         | 70.0          | 14                                                 | 100.0         | 4 |
| Retained after training                                  |                                                             |               |                                                    |               |   |
|                                                          | Yes                                                         | 75.0          | 15                                                 | 100.0         | 4 |

## 421 7 Conflict of Interest

422 The authors declare that the research was conducted in the absence of any commercial or financial  
423 relationships that could be construed as a potential conflict of interest.

## 424 8 Author Contributions

425 CC, JMI, GM, MD and AS participated in the conceptualization. CC and JMI developed the  
426 methodology. CC made formal analysis and drafted the manuscript. JMI, MD and AS reviewed  
427 initial draft. All the authors read, corrected, and approved the final manuscript.

## 428 9 Funding

429 Curema project is funded by European Funds FEDER-PCIA and Synergy no 8754, and by Regional  
430 Health Agency of French Guiana.

## 431 10 Acknowledgments

432 Authors would like to thank all CHWs who participated to the training and the evaluation, and who are  
433 currently make possible the implementation of Curema intervention in the field. Moreover, authors  
434 thank Surinamese MoH and particularly the NMEP for their support to CHWs' training program in  
435 Paramaribo.

## 436 11 References

- 437 1. World Health Organization. World malaria report 2022 [Internet]. Geneva: World Health  
438 Organization; 2022. Available from: <https://www.who.int/publications/i/item/9789240064898>
- 439 2. Ministério da Saúde. Boletim Epidemiológico Especial - Malária 2021 [Internet]. Secretaria de  
440 Vigilância em Saúde. 2021 [cited 2023 Sep 13]. Available from: [https://www.gov.br/saude/pt-  
441 br/centrais-de-  
442 conteudo/publicacoes/boletins/epidemiologicos/especiais/2021/boletim\\_epidemiologico\\_especial  
443 \\_malaria\\_2021.pdf/view](https://www.gov.br/saude/pt-br/centrais-de-conteudo/publicacoes/boletins/epidemiologicos/especiais/2021/boletim_epidemiologico_especial_malaria_2021.pdf/view)
- 444 3. Musset L, Pelleau S, Girod R, Ardillon V, Carvalho L, Dusfour I, et al. Malaria on the Guiana  
445 Shield: a review of the situation in French Guiana. *Mem Inst Oswaldo Cruz*. 2014  
446 Aug;109(5):525–33.
- 447 4. Douine M, Lambert Y, Musset L, Hiwat H, Blume LR, Marchesini P, et al. Malaria in Gold  
448 Miners in the Guianas and the Amazon: Current Knowledge and Challenges. *Curr Trop Med  
449 Rep*. 2020 Jun 1;7(2):37–47.
- 450 5. Douine M, Musset L, Corlin F, Pelleau S, Pasquier J, Mutricy L, et al. Prevalence of Plasmodium  
451 spp. in illegal gold miners in French Guiana in 2015: a hidden but critical malaria reservoir.  
452 *Malar J*. 2016 Jun 9;15:315.
- 453 6. Douine M, Mosnier E, Le Hingrat Q, Charpentier C, Corlin F, Hureau L, et al. Illegal gold  
454 miners in French Guiana: a neglected population with poor health. *BMC Public Health*. 2017 Jul  
455 17;18(1):23.

- 456 7. Le Tourneau FM. Chercheurs d'or - L'orpillage clandestin en Guyane française [Internet]. CNR  
457 editions. 2020 [cited 2023 Sep 12]. Available from:  
458 <https://www.cnrseditions.fr/catalogue/geographie-territoires/chercheurs-d-or/>
- 459 8. Marmot M, Friel S, Bell R, Houweling TAJ, Taylor S, Commission on Social Determinants of  
460 Health. Closing the gap in a generation: health equity through action on the social determinants  
461 of health. *Lancet Lond Engl*. 2008 Nov 8;372(9650):1661–9.
- 462 9. Bhutta, Zulfiqar & Lassi, Zohra & Pariyo, George & Huicho, Luis. Global Experience of  
463 Community Health Workers for Delivery of Health Related Millennium Development Goals: A  
464 Systematic Review, Country Case Studies, and Recommendations for Integration into National  
465 Health Systems. WHO Global Health Workforce Alliance (GHWA) Geneva: World Health  
466 Organization. 2010.
- 467 10. Rocha R, Soares RR. Evaluating the Impact of Community-Based Health Interventions: Evidence  
468 from Brazil's Family Health Program. IZA DP. 2009.
- 469 11. Christopher JB, Le May A, Lewin S, Ross DA. Thirty years after Alma-Ata: a systematic review  
470 of the impact of community health workers delivering curative interventions against malaria,  
471 pneumonia and diarrhoea on child mortality and morbidity in sub-Saharan Africa. *Hum Resour*  
472 *Health*. 2011 Oct 24;9:27.
- 473 12. Chanda P, Hamainza B, Moonga HB, Chalwe V, Pagnoni F. Community case management of  
474 malaria using ACT and RDT in two districts in Zambia: achieving high adherence to test results  
475 using community health workers. *Malar J*. 2011 Jun 9;10(1):158.
- 476 13. Sunguya BF, Mlunde LB, Ayer R, Jimba M. Towards eliminating malaria in high endemic  
477 countries: the roles of community health workers and related cadres and their challenges in  
478 integrated community case management for malaria: a systematic review. *Malar J*. 2017 Jan  
479 3;16(1):10.
- 480 14. Galindo MS, Lambert Y, Mutricy L, Garancher L, Bordalo Miller J, Gomes JH, et al. Setting-up  
481 a cross-border action-research project to control malaria in remote areas of the Amazon:  
482 describing the birth and milestones of a complex international project (Malakit). *Malar J*. 2021  
483 Dec;20(1):216.
- 484 15. Douine M, Sanna A, Galindo M, Musset L, Pommier de Santi V, Marchesini P, et al. Malakit: an  
485 innovative pilot project to self-diagnose and self-treat malaria among illegal gold miners in the  
486 Guiana Shield. *Malar J*. 2018 Apr 10;17(1):158.
- 487 16. Douine M, Lambert Y, Galindo MS, Mutricy L, Sanna A, Peterka C, et al. Self-diagnosis and  
488 self-treatment of malaria in hard-to-reach and mobile populations of the Amazon: results of  
489 Malakit, an international multicentric intervention research project. *Lancet Reg Health – Am*  
490 [Internet]. 2021 Dec 1 [cited 2022 Nov 9];4. Available from:  
491 [https://www.thelancet.com/journals/lanam/article/PIIS2667-193X\(21\)00039-9/fulltext](https://www.thelancet.com/journals/lanam/article/PIIS2667-193X(21)00039-9/fulltext)
- 492 17. Parent AA, Galindo MS, Lambert Y, Douine M. Combatting malaria disease among gold miners:  
493 a qualitative research within the Malakit project. *Health Promot Int*. 2022 Aug 1;37(4):daac058.

- 494 18. Douine M, Cairo H, Galindo MS, Vreden S, Lambert Y, Adenis A, et al. From an interventional  
495 study to a national scale-up: lessons learned from the Malakit strategy at the French Guiana–  
496 Suriname border. *Malar J.* 2023 Aug 16;22(1):237.
- 497 19. Curema project - Malakit [Internet]. 2023 [cited 2023 Sep 25]. Available from:  
498 <https://www.malakit-project.org/curema-project/>
- 499 20. Sanna A, Lambert Y, Musset L, Vreden S, Suárez-Mutis M, White M, et al. CUREMA: an  
500 operational research project aiming malaria elimination among hard-to-reach mobile population  
501 in the Guiana Shield. [Internet]. 2021. Available from:  
502 [https://www.researchgate.net/publication/358646601\\_CUREMA\\_an\\_operational\\_research\\_proje](https://www.researchgate.net/publication/358646601_CUREMA_an_operational_research_project_aiming_malaria_elimination_among_hard-to-reach_mobile_population_in_the_Guiana_Shield)  
503 [ct\\_aiming\\_malaria\\_elimination\\_among\\_hard-to-](https://www.researchgate.net/publication/358646601_CUREMA_an_operational_research_proje)  
504 [reach\\_mobile\\_population\\_in\\_the\\_Guiana\\_Shield](https://www.researchgate.net/publication/358646601_CUREMA_an_operational_research_proje)
- 505 21. Kobel S, Wartha O, Wirt T, Dreyhaupt J, Lämmle C, Friedemann EM, et al. Design,  
506 Implementation, and Study Protocol of a Kindergarten-Based Health Promotion Intervention.  
507 *BioMed Res Int.* 2017;2017:1–9.
- 508 22. Lai AY, Stewart SM, Mui MW, Wan A, Yew C, Lam TH, et al. An Evaluation of a Train-the-  
509 Trainer Workshop for Social Service Workers to Develop Community-Based Family  
510 Interventions. *Front Public Health.* 2017 Jun 30;5:141.
- 511 23. Mormina M, Pinder S. A conceptual framework for training of trainers (ToT) interventions in  
512 global health. *Glob Health.* 2018 Dec;14(1):100.
- 513 24. De Rooij D, Belfroid E, Hadjichristodoulou C, Mouchtouri VA, Raab J, Timen A, et al.  
514 Educating, training, and exercising for infectious disease control with emphasis on cross-border  
515 settings: an integrative review. *Glob Health.* 2020 Dec;16(1):78.
- 516 25. de Sousa A, Tiedje KE, Recht J, Bjelic I, Hamer DH. Community case management of childhood  
517 illnesses: policy and implementation in Countdown to 2015 countries. *Bull World Health Organ.*  
518 2012 Mar 1;90(3):183–90.
- 519 26. Olaniran A, Smith H, Unkels R, Bar-Zeev S, van den Broek N. Who is a community health  
520 worker? - a systematic review of definitions. *Glob Health Action.* 2017;10(1):1272223.
- 521 27. Hiwat H, Martínez-López B, Cairo H, Hardjopawiro L, Boerleider A, Duarte EC, et al. Malaria  
522 epidemiology in Suriname from 2000 to 2016: trends, opportunities and challenges for  
523 elimination. *Malar J.* 2018 Nov 12;17(1):418.
- 524 28. Knowles MS. *Andragogy: Adult Learning Theory in Perspective.* Community Coll Rev. 1978  
525 Jan;5(3):9–20.
- 526 29. Bloom, B. S. *Taxonomy of educational objectives: The classification of educational goals.* 1st ed.  
527 Longman Group.; 1956.
- 528 30. Krathwohl DR. A Revision of Bloom’s Taxonomy: An Overview. *Theory Pract.* 2002 Nov  
529 1;41(4):212–8.



- 530 31. Barbe WB, Swassing RH, Milone MN. Teaching through modality strengths: concepts and  
531 practices. Columbus, Ohio: Zaner-Bloser; 1979. 117 p.
- 532 32. and N center for chronic disease prevention, health promotion, division of population health.  
533 CDC. Understanding the training of trainers model. Available from:  
534 [https://www.cdc.gov/healthyschools/professional\\_development/documents/17\\_279600\\_Trainers](https://www.cdc.gov/healthyschools/professional_development/documents/17_279600_Trainers)  
535 [Model-FactSheet\\_v3\\_508Final.pdf](https://www.cdc.gov/healthyschools/professional_development/documents/17_279600_Trainers/Model-FactSheet_v3_508Final.pdf)
- 536 33. 14:00-17:00. ISO. [cited 2023 Sep 12]. ISO 8402:1994. Available from:  
537 <https://www.iso.org/standard/20115.html>
- 538 34. Kirkpatrick DL, Kirkpatrick JD. Evaluating training programs: the four levels. 3rd ed. San  
539 Francisco, CA: Berrett-Koehler; 2006. 372 p.
- 540 35. Article R1121-1 - Code de la santé publique - Légifrance [Internet]. [cited 2023 Sep 12].  
541 Available from: [https://www.legifrance.gouv.fr/codes/article\\_lc/LEGIARTI000043723460](https://www.legifrance.gouv.fr/codes/article_lc/LEGIARTI000043723460)
- 542 36. Global Malaria Programme WHO. Zeroing in on malaria elimination: Final report of the E-2020  
543 initiative [Internet]. Geneva: World Health Organization; 2021. Available from:  
544 <https://www.who.int/publications/i/item/9789240024359>
- 545 37. Ministério da Saúde. Secretaria de Vigilância em Saúde. Departamento de Imunização e Doenças  
546 Transmissíveis. Elimina Malária Brasil: Plano Nacional de Eliminação da Malária. Brasília:  
547 Ministério da Saúde; 2022.
- 548 38. Galindo MS, Lambert Y, Mutricy L, Garancher L, Miller JB, Gomes JH, et al. Implementation of  
549 a novel malaria management strategy based on self-testing and self-treatment in remote areas in  
550 the Amazon (Malakit): confronting a-priori assumptions with reality. BMC Public Health. 2022  
551 Apr 15;22(1):770.
- 552 39. Craig P, Dieppe P, Macintyre S, Michie S, Nazareth I, Petticrew M, et al. Developing and  
553 evaluating complex interventions: the new Medical Research Council guidance. BMJ. 2008 Sep  
554 29;337:a1655.
- 555 40. Sanna A, Suarez Mutis M, Lambert Y, Carvalho L, Cairo H, Cox H, et al. Cooperation for  
556 malaria control and elimination in the Guiana Shield – Many hands make light work. 2023.  
557 (under publication).
- 558 41. Bazeyo W, Bagonza J, Halage A, Okure G, Mugagga M, Musoke R, et al. Ebola a reality of  
559 modern Public Health; need for Surveillance, Preparedness and Response Training for Health  
560 Workers and other multidisciplinary teams: a case for Uganda. Pan Afr Med J. 2015 Apr  
561 23;20:404.
- 562 42. Peters DH, Tran NT, Adam T. Implementation research in health: a practical guide. Alliance for  
563 Health Policy and Systems Research, World Health Organization; 2013.
- 564 43. Carroll C, Patterson M, Wood S, Booth A, Rick J, Balain S. A conceptual framework for  
565 implementation fidelity. Implement Sci. 2007 Nov 30;2(1):40.

- 566 44. von Thiele Schwarz U, Giannotta F, Neher M, Zetterlund J, Hasson H. Professionals'  
567 management of the fidelity–adaptation dilemma in the use of evidence-based interventions—an  
568 intervention study. *Implement Sci Commun*. 2021 Mar 16;2(1):31.
- 569 45. Miller CJ, Wiltsey-Stirman S, Baumann AA. Iterative Decision-making for Evaluation of  
570 Adaptations (IDEA): A decision tree for balancing adaptation, fidelity, and intervention impact. *J*  
571 *Community Psychol*. 2020 May;48(4):1163–77.
- 572 46. Holtrop JS, Gurfinkel D, Nederveld A, Phimphasone-Brady P, Hosokawa P, Rubinson C, et al.  
573 Methods for capturing and analyzing adaptations: implications for implementation research.  
574 *Implement Sci*. 2022 Jul 29;17(1):51.
- 575 47. Stirman SW, Miller CJ, Toder K, Calloway A. Development of a framework and coding system  
576 for modifications and adaptations of evidence-based interventions. *Implement Sci*. 2013 Jun  
577 10;8(1):65.
- 578 48. World Health Organization (WHO). What do we know about community health workers? A  
579 systematic review of existing reviews. 2020. (Human Resources for Health Observer Series).
- 580 49. Rega PP, Fink BN. Immersive simulation education: a novel approach to pandemic preparedness  
581 and response. *Public Health Nurs Boston Mass*. 2014;31(2):167–74.
- 582 50. Bosch-Capblanch X, Marceau C. Training, supervision and quality of care in selected integrated  
583 community case management (iCCM) programmes: A scoping review of programmatic evidence.  
584 *J Glob Health*. 2014 Dec;4(2):020403.
- 585 51. Dambisya YM, Matinhure S. Policy and programmatic implications of task shifting in Uganda: a  
586 case study. *BMC Health Serv Res*. 2012 Mar 12;12:61.
- 587 52. Peltzer K, Tabane C, Matseke G, Simbayi L. Lay counsellor-based risk reduction intervention  
588 with HIV positive diagnosed patients at public HIV counselling and testing sites in Mpumalanga,  
589 South Africa. *Eval Program Plann*. 2010 Nov;33(4):379–85.
- 590 53. Abdel-All M, Putica B, Praveen D, Abimbola S, Joshi R. Effectiveness of community health  
591 worker training programmes for cardiovascular disease management in low-income and middle-  
592 income countries: a systematic review. *BMJ Open*. 2017 Nov 3;7(11):e015529.
- 593 54. Adams LB, Richmond J, Watson SN, Cené CW, Urrutia R, Ataga O, et al. Community Health  
594 Worker Training Curricula and Intervention Outcomes in African American and Latinx  
595 Communities: A Systematic Review. *Health Educ Behav Off Publ Soc Public Health Educ*. 2021  
596 Aug;48(4):516–31.
- 597 55. O'Brien MJ, Squires AP, Bixby RA, Larson SC. Role Development of Community Health  
598 Workers. *Am J Prev Med*. 2009 Dec;37(6 Suppl 1):S262–9.
- 599 56. Lee CN, Matthew RA, Orpinas P. Design, implementation, and evaluation of community health  
600 worker training programs in Latinx communities: A scoping review. *J Community Psychol*. 2023  
601 Jan;51(1):382–405.

- 602 57. Schleiff MJ, Aitken I, Alam MA, Damtew ZA, Perry HB. Community health workers at the  
603 dawn of a new era: 6. Recruitment, training, and continuing education. *Health Res Policy Syst.*  
604 2021 Oct 12;19(3):113.
- 605 58. Takasugi T, Lee ACK. Why do community health workers volunteer? A qualitative study in  
606 Kenya. *Public Health.* 2012 Oct;126(10):839–45.
- 607 59. Kok MC, Muula AS. Motivation and job satisfaction of Health Surveillance Assistants in  
608 Mwanza, Malawi: an explorative study. *Malawi Med J.* 2013 Mar;25(1):5–11.
- 609 60. Martinez R, Vivancos R, Visschers B, Namatovu L, Nyangoma E, Walley J. Training needs,  
610 practices and barriers in the work of community reproductive health workers in Masindi district,  
611 Uganda. *Trop Doct.* 2008 Apr;38(2):93–5.
- 612 61. Kok MC, Kane SS, Tulloch O, Ormel H, Theobald S, Dieleman M, et al. How does context  
613 influence performance of community health workers in low- and middle-income countries?  
614 Evidence from the literature. *Health Res Policy Syst.* 2015 Mar 7;13(1):13.
- 615 62. Curtale F, Siwakoti B, Lagrosa C, LaRaja M, Guerra R. Improving skills and utilization of  
616 community health volunteers in Nepal. *Soc Sci Med* 1982. 1995 Apr;40(8):1117–25.
- 617 63. Puchalski Ritchie LM, van Lettow M, Barnsley J, Chan AK, Schull MJ, Martiniuk ALC, et al.  
618 Lay Health Workers experience of a tailored knowledge translation intervention to improve job  
619 skills and knowledge: a qualitative study in Zomba district Malawi. *BMC Med Educ.* 2016 Feb  
620 9;16(1):54.

621 **Data Availability Statement**

622 Data available under reasonable request to the corresponding author.

| CHW's tasks                                                                               | Enrolling process           | Knowledge or skill required                                                          |
|-------------------------------------------------------------------------------------------|-----------------------------|--------------------------------------------------------------------------------------|
| Stock management                                                                          | Inventory of inclusion site | Team-work<br>Time management                                                         |
| Outreach activities                                                                       |                             | Public speaking<br>Health education<br>Active listening<br>Synthesis skills          |
| Regulatory procedures                                                                     |                             | Inclusion criteria<br>Risk-benefit balance<br>Ethics and good clinical practice      |
| Data collection                                                                           |                             | Use of tablets<br>Interview skills<br>Active listening<br>Eligibility criteria       |
| Training<br>Teach-back                                                                    |                             | Health education<br>Active listening<br>Synthesis skills                             |
| Diagnostic activities<br>Teach-back                                                       |                             | Use of health devices<br>Interpretation of test results<br>Active listening          |
| Data collection                                                                           |                             | Use of tablets<br>Interview skills<br>Active listening<br>Eligibility criteria       |
| Training<br>Teach-back                                                                    |                             | Health education<br>Active listening<br>Synthesis skills                             |
| Download<br>Training<br>Teach-back                                                        |                             | Use of smartphone<br>QRcode-driven downloads<br>Active listening<br>Synthesis skills |
| Treatment delivery<br>Kit delivery                                                        |                             | Drug management<br>Control procedures                                                |
| Appointments<br>Data collection<br>Participant referring<br>Handover to coordination team |                             | Knowledge of side effects<br>Organizational skills<br>Time management<br>Team-work   |

February to March 2023

March 2023 to December 2024

Prior activities to the setting up of the Curema intervention

Launch of the Curema intervention at the inclusion sites

Curema intervention on going in the field

**QUALITY AND EFFECTIVENESS EVALUATION**

**EVALUATION STEP 1**

**EVALUATION STEP 2**

Pre-training knowledge survey

Observation

Post-training knowledge survey, Satisfaction test

Observation, In-depth interviews

**INITIAL TRAINING**

**ON-THE-JOB TRAINING**

**RETRAINING (DO-CHECK-ADJUST)**

**TRAINING PROGRAM**

**SUPERVISION**

**CONTINUOUS PROFESSIONAL DEVELOPMENT**



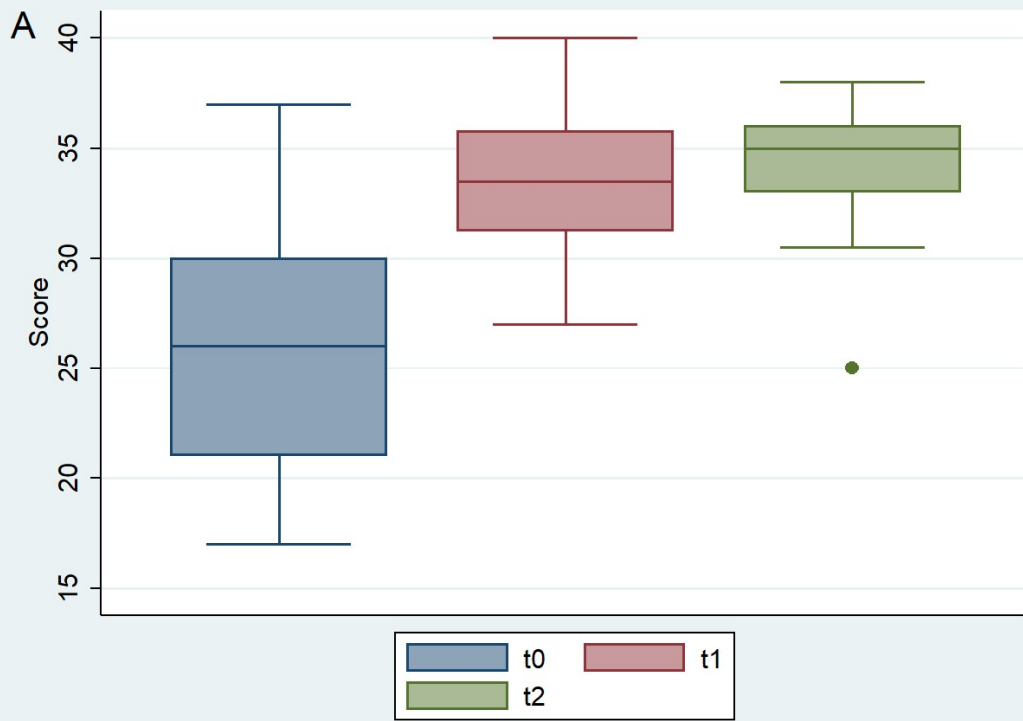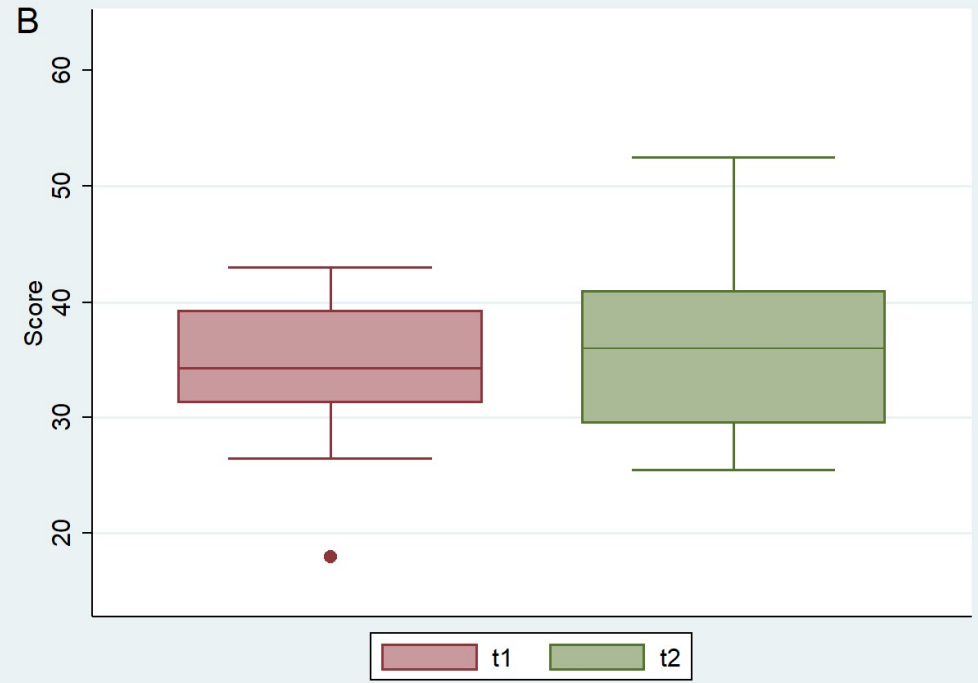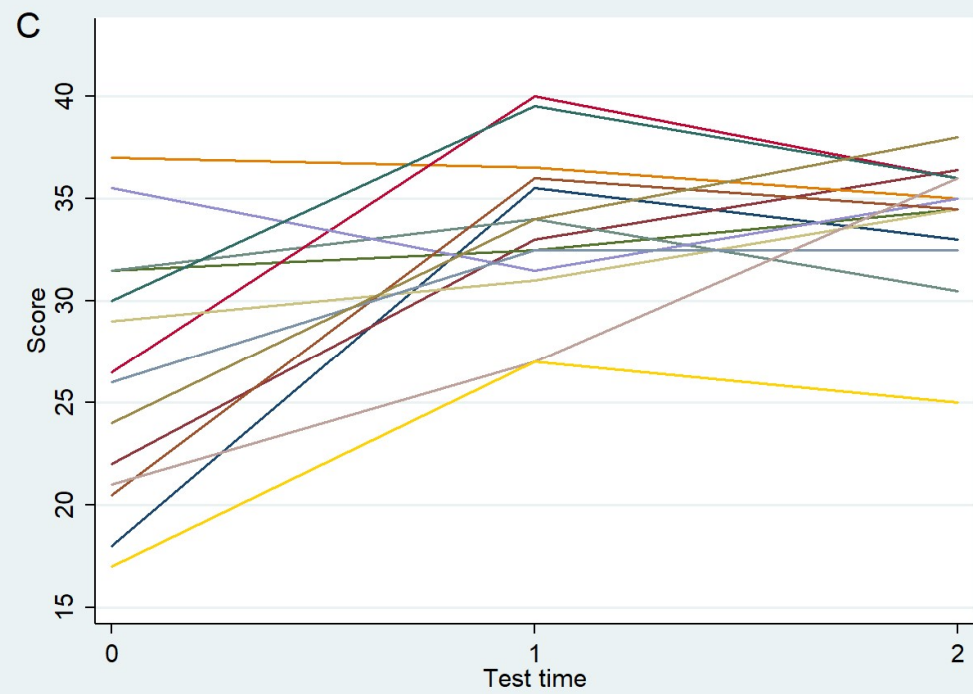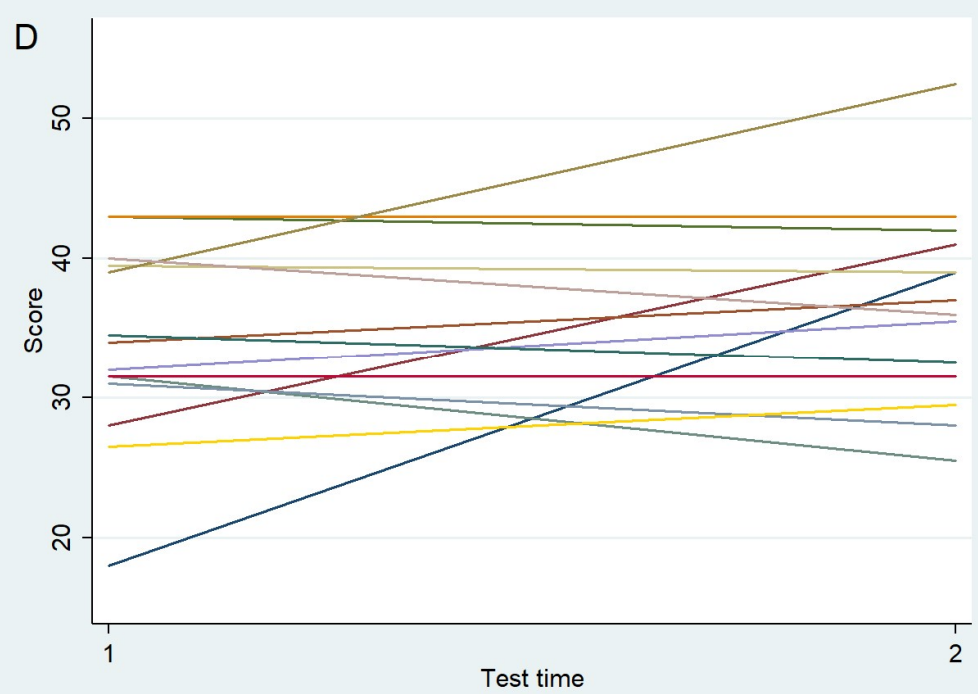

Source: https://medrxiv.org/content/10.1101/2023.10.10.23296813.full.pdf
